# Supplementary material for: Dietary habits and nutrition status in esophageal cancer patients after esophageal reconstruction
Source: PubMed Central journal article supplement — J Thorac Dis. 2024 Feb 20;16(2):1118–27. doi: 10.21037/jtd-23-1266 (PMC10944728; doi:10.21037/jtd-23-1266), 2024-02-20
Supplement: jtd-16-02-1118-dss.pdf [file jtd-16-02-1118-dss.pdf]

## Data Sharing Statement

|                     |                                                                                                                                                     |                                                                                                                                               |
|---------------------|-----------------------------------------------------------------------------------------------------------------------------------------------------|-----------------------------------------------------------------------------------------------------------------------------------------------|
| <b>Article Info</b> | <a href="https://dx.doi.org/10.21037/jtd-23-1266">https://dx.doi.org/10.21037/jtd-23-1266</a>                                                       |                                                                                                                                               |
| <b>Item</b>         | <b>Question</b>                                                                                                                                     | <b>Authors' Response<br/>(place "-" if not applicable)</b>                                                                                    |
| 1                   | Would you like to share data collected for your study to others?                                                                                    | Yes                                                                                                                                           |
| 2                   | If not, would you like to share the reason for your decision?                                                                                       | -                                                                                                                                             |
| 3                   | What data in particular will be shared?                                                                                                             | Date regarding Dietary habits data and Nutrition status evaluation data.                                                                      |
| 4                   | Any other documents will be shared? Such as study protocol, statistical analysis plan, informed consent form, clinical study report, analytic code. | Statistical analysis can be shared and clarified if desired.                                                                                  |
| 5                   | When will data availability begin?                                                                                                                  | Immediately at publication.                                                                                                                   |
| 6                   | When will data availability end?                                                                                                                    | 6 months following publication.                                                                                                               |
| 7                   | To whom will you share the data?                                                                                                                    | Thoracic surgeons and their associated research teams.                                                                                        |
| 8                   | For what type of analysis or purpose?                                                                                                               | To assist in larger scale studies of Dietary habits and nutrition status in esophageal cancer patients after esophageal reconstruction        |
| 9                   | How or where can the data/documents be obtained?                                                                                                    | Written requests should be mailed to Dr. Liang-Dai, M.D. Email: dailiangsharp26@bjmu.edu.cn                                                   |
| 10                  | Any other restrictions?                                                                                                                             | We reserve the right to deny data sharing requests. We may balance the potential benefits and risks for each request on a case by case basis. |
