# Supplementary material for: Dietary habits and nutrition status in esophageal cancer patients after esophageal reconstruction
Source: PubMed Central journal article supplement — J Thorac Dis. 2024 Feb 20;16(2):1118–27. doi: 10.21037/jtd-23-1266 (PMC10944728; doi:10.21037/jtd-23-1266), 2024-02-20
Supplement: jtd-16-02-1118-supplementary.pdf [file jtd-16-02-1118-supplementary.pdf]

### Appendix 1: Postoperative nutrition management, patient education, and follow-up

Nasoduodenal nutrition tube was routinely indwelled for all patients during the operation. Enteral nutrition was started within 24 h after the operation. After discharge, the patients continued to receive enteral nutrition support until 1 month postoperatively. Under the guidance of doctors and nutrition specialists, the discharged patients began to be fed orally 2 weeks after the operation, starting from solid soft food, and gradually transitioning to regular food intake. Subsequently, the frequency of food intake was gradually increased to more than six times/day. Within 1 month after discharge, the patients were given eating guidance by a specialized nurse every week. The first doctor's follow-up was generally arranged within 1–2 weeks after discharge, and specific suggestions were provided for the possible changes in diet and lifestyle after esophagectomy. Then, the patients received regular outpatient and telephone nutritional follow-ups. The follow-up nurses were uniformly trained and used standardized terms. Follow-up was conducted 1, 3, 6, 12, and 30 months after the operation.

**Table S1** Food types and the corresponding energy

| Common food       | Energy (kcal/100 g) |
|-------------------|---------------------|
| Rice              | 116                 |
| Steamed bun       | 233                 |
| Meat pie          | 210                 |
| Sten              | 223                 |
| Baked roll        | 326                 |
| Soft food         | –                   |
| Noodles           | 109                 |
| Rice noodles      | 97                  |
| Rice flour        | 346                 |
| Rice cake         | 194                 |
| Semi-liquid food  | –                   |
| Jellied bean curd | 10                  |
| Rice porridge     | 46                  |
| Liquid food       | –                   |
| Rice soup         | 49                  |
| Lotus root starch | 373                 |
| Vegetable juice   | 29                  |
| Soybean milk      | 13                  |
| Soy milk          | 30                  |
